# Supplementary material for: Marker Recycling in Candida albicans through CRISPR-Cas9-Induced Marker Excision
Source: PubMed Central journal article supplement (PMC5352831; doi:10.1128/msphere.00050-17), 2017-03-15
Supplement: sph002172252s3.pdf [file sph002172252s3.pdf]

>pMH01

TCGCGCGTTTTCGGTGATGACGGTGAAAACCTCTGACACATGCAGCTCCCGGAGACGGTACAGCTTGTCTGTAAGCGGA  
TGCCGGGAGCAGACAAGCCCCTCAGGGCGCGTCAGCGGGTGTGGCGGGTGTGCGGGCTGGCTTAACTATGCGGCATCA  
GAGCAGATTGTACTGAGAGTGCACCATAAACGACATTACTATATATATAATATAGGAAGCATTTAATAGACAGCATCGT  
AATATATGTGTACTTTGCAGTTATGACGCCAGATGGCAGTAGTGGAAGATATTCTTTATTGAAAAATAGCTTGTACCT  
TACGTACAATCTTGATCCGGAGCTTTTCTTTTTTTGCGGATTAAGAATTAATTTCGGTCGAAAAAAGAAAAGGAGAGGGC  
CAAGAGGGAGGGCATTGGTGACTATTGAGCACGTGAGTATACGTGATTAAGCACACAAAGGCAGCTTGGAGTATGTCTG  
TTATTAATTTTACAGGTAGTTCTGGTCCATTGGTGAAAAGTTTTGCGGCTTGACAGAGCACAGAGGCCGAGAAATGTGCTCT  
AGATTCCGATGCTGACTTGTGGGTATTATATGTGTGCCCAATAGAAAGAGAACAATTGACCCGGTTATTGCAAGGAAA  
ATTTCAAGTCTTGTAAAAGCATATAAAAATAGTTTCCAGGCACTCCGAAATACTTGGTTGGCGTGTTCGTAATCAACCTA  
AGGAGGATGTTTTGGCTCTGGTCAATGATTACGGCATTGATATCGTCCAATGCATGGAGATGAGTCGTGGCAAGAATA  
CCAAGAGTTCCTCGGTTTTGCCAGTTATTAAAAAGACTCGTATTTCCAAAAGACTGCAACATACTACTCAGTGCAGCTTCA  
CAGAAACCTCATTCTGTTTTATTCCCTTGTGGATTGAGAAGCAGGTGGGACAGGTGAACTTTTGGATTGGAACCTCGATTT  
CTGACTGGGTTGGAAGGCAAGAGAGCCCCGAAAGCTTACATTTTTATGTTAGCTGGTGGACTGACGCCAGAAAATGTTGG  
TGATGCGCTTAGATTAAATGGCGTTATTGGTGTGATGTAAGCGGAGGTGTGGAGACAAATGGTGTAAAAGACTCTAAC  
AAAATAGCAAATTTTCGTCAAAAATGCTAAGAAATAGGTTATTACTGAGTAGTATTTATTTAAGTATTGTTTGTGCACTT  
GCCTATGCGGTGTGAAATACCGCACAGATGCGTAAGGAGAAAATACCGCATCAGGAAATGTAACGTTAATATTTTGT  
TAAAATTTCGCGTTAAATTTTTGTTAAATCAGCTCATTTTTTAACCAATAGGCCGAAATCGGCAAAATCCCTTATAAATC  
AAAAGATAGACCGAGATAGGGTTGAGTGTGTTCCAGTTTTGGAACAAGAGTCCACTATTAAGAACGTGGACTCCAAC  
GTCAAAGGGCGAAAAACCGCTATCAGGGCGTACGGGCCACTACGTGAACCATCACCTAATCAAGTTTTTTGGGGTCGA  
GGTGCCGTAAAGACTAAATCGGAACCCTAAAGGGACCCCCGATTTAGAGCTTGACGGGGAAAGCCGGCGAACGTGGC  
GAGAAAGGAAGGGAAGAAAGCGAAAGGAGCGGGCGCTAGGGCGCTGGCAAGTGTAGCGGTCACGCTGCGCGTAACCACC  
ACACCCGCCGCGCTTAATGCGCCGCTACAGGGCGCGTTCGCGCCATTTCAGGCTGCGCAACTGTTGGGAAGGGC  
GATCGGTGCGGGCTCTTCGCTATTACGCCAGCTGGCGAAAGGGGGATGTGCTGCAAGGCGATTAAGTTGGGTAACGCC  
AGGGTTTTCCAGTCACGACGTTGTAAAACGACGGCCAGTGAGCGCGCGTAATACGACTCACTATAGGGCGGCCAGTGT  
GATGGATATCTGCAGAATTCGCCCTTctagaaaaccgtaccaggtgaactgtttaattggaggatac gatgtaagaca  
aatcagccgctcgttgaattggatagattattaggtacgcaagttgaacgtccttatgggtgctcatggctacgcagcat  
tttacacaacatccttgttagataaacattatagaaaggacatgacagttgaagatggtttgaagttaatggacatgtg  
tgtcaaagaattacaaacgagaatgccattgattttaaaggtgtgtacatcaaggtggtagataaagatggtataaga  
cagattgagtc aaattgaagtaaatctataagtatgtatataatagatattttat taaactctacaatttgat atctcgag  
caccaatataatctggtgcccagctttcttcaattcatccattacattaatctctttctgttaacctggaagaa  
atggcaaccagtcactcttcgctcgtcactgtgtttatccaaagtgagacagtggtgcccctctacctggagtaatgg  
ttaagcactttgattgaaatggatggaggcattgtagttacacaagacatattcctgagccgctaaaacaccttgaag  
tctttggacaattatgttgaccattctggaaatttgggtttcttggaggaaatcaaagagcgggaagttccaatag  
gtttcgatcgcctttaaaccagcagctttcatgggtctctccactttcaactaaatcgacaatggcgtcggcaacacca  
atgcgcaagaagcctcaactgaaccaccaacgtatctaataatctgtaggtttgtcggataatttcttgaatagtcagt  
actcaactttgtaaaggaggatacaatcttctttccaacagagttgttcgggttttctgactcgccatttgcaggaact

tggatctgcaatttacatgagccaaacttcaaatacaacaatcctcaatggtgtcgaattgggtctgcttctttgatct  
gggtctaaccagttatacccaagtcaacaattaccttctccaacgaaaactggaatatcggctgcaggcaaaaagattaa  
tgcaattggcaagtttgtggaagggaatataccaatctattagatcttctaactgtatatcggcaccgctcaataag  
ctgcagcattttcatataaatctgcccttttgggaacagcaataaacaacgatcgggcaaatgattgactaaatcca  
tagtgaatatgtaggtggtggttagaagaaaagtggtatataatgggtggtgggaaaaatcttcacaaaaaaaaaaaa  
ataaaaaaatttcaatgactcaatacattttttttgtaccggttatcgctttgagacacgtttcaaagaaacacctga  
aataaacaaggtgtacgtttcaaaaaaaaaaaaaaaaaactattgaataaataaaaactgtcctattactttttgcctat  
atcttcaacatcttcttcttctcggtatgactgtatcctcttcagttcctaaattggtactactaacttcgggtctcttctg  
tcctccaggtaccgggtcaagccctgtagctccatttgggtggtttattaattcttcttccatttgggtcttctactacca  
agttattactaaccatataccatttgggtttccatacatgtatgtttaaaccctcagttgagtaaaatcttgagcat  
atcccatggtctagaatgccggccataacttgtcgacaaacacaactgcacaatctggcgacaccggttgccataaaag  
aaagtctgaaagtctaaatggtcctgatgttcttactagtaaatccaatgggggacacatcttctgataaagatgcttg  
tcgatagcctcctcgggtatttcaataccaccttctcgtcgttctcgtctactactgacttgatcagatgggttatctcgt  
ctcttgatgtatatgggaagcagacattcaacacagcagcgttatgttttagttatcttctcgggtcttctcaaggat  
ctctaacacatcttctcggcaaaagtttgggtatcttaataatcttgattttaaccctatactcctcacacaacaatcca  
tgttgggtttatttgcgtaaaacttggatttggctaatccatcaaccatttgacctcatattgcagctctcttgaagttt  
cgatcgaanaatgcataaacgggtggcaccatttcacaccagctcgtataataattctagtagcttgccatgggtatcaaa  
cAAGGGCGAATTCAGCACACTGGCGGCTCGAGGTCGACGGTATCGATAAGCTTGATATCGAATTCCTGCAGCCCGGG  
GATCCACTAGTTCTAGAGCGGCCGCCACCGCGGTGGAGCTCCAGCTTTTGTTCCTTTAGTGAGGGTTAATTGCGCGCT  
TGGCGTAATCATGGTCATAGCTGTTTCTGTGTGAAATTGTTATCCGCTCACAAATCCACACAACATAGGAGCCGGAAG  
CATAAAGTGTAAAGCCTGGGGTGCCTAATGAGTGAGGTAATCATATTAATTGCGTTGCGCTCACTGCCCGCTTTCCAG  
TCGGGAAACCTGTCTGCCAGCTGCATTAATGAATCGGCCAACCGCGGGGAGAGGCGGTTTGCGTATTGGGCGCTCTT  
CCGCTTCTCGCTCACTGACTCGCTGCGCTCGGTCGTTTCGGCTGCGGCGAGCGGTATCAGCTCACTCAAAGGCGGTAAT  
ACGGTTATCCACAGAATCAGGGGATAACGCAGGAAAGAATGTGAGCAAAAAGGCCAGCAAAAAGGCCAGGAACCGTAAA  
AAGGCCGCGTTGCTGGCGTTTTTCCATAGGCTCCGCCCCCTGACGAGCATCACAAAAATCGACGCTCAAGTCAGAGGT  
GGCGAAACCCGACAGGACTATAAAGATACCAGGCGTTTTCCCCCTGGAAGCTCCCTCGTGCGCTCTCCTGTTCCGACCCT  
GCCGCTTACCGGATACCTGTCCGCCTTTCTCCCTTCGGGAAGCGTGGCGCTTTCTCATAGCTCACGCTGTAGGTATCTC  
AGTTCCGGTGTAGGTCGTTTCGCTCCAAGCTGGGCTGTGTGCACGAACCCCGTTTCAGCCCGACCGCTGCGCCTTATCCG  
GTAACATATCGTCTTGAGTCCAACCCGGTAAGACACGACTTATCGCCACTGGCAGCAGCCACTGGTAACAGGATTAGCAG  
AGCGAGGTATGTAGGCGGTGCTACAGAGTTCTTGAAGTGGTGGCCTAACTACGGCTACACTAGAAGGACAGTATTTGGT  
ATCTGCGCTCTGCTGAAGCCAGTTACCTTCGGAAAAAGAGTTGGTAGCTCTTGATCCGGCAAACAAACCACCGCTGGTA  
GCGGTGGTTTTTTTTGTTTTGCAAGCAGCAGATTACGCGCAGAAAAAAGGATCTCAAGAAGATCCTTTGATCTTTTCTAC  
GGGGTCTGACGCTCAGTGGAAACGAAAACCTCACGTTAAGGGATTTTGGTCATGAGATTATCAAAAAGGATCTTCACCTAG  
ATCCTTTTAAATTAATAATGAAGTTTTAAATCAATCTAAAGTATATATGAGTAAACTTGGTCTGACAGTTACCAATGCT  
TAATCAGTGAGGCACCTATCTCAGCGATCTGTCTATTTTCGTTTCATCCATAGTTGCCTGACTCCCCGTCTGTAGATAAC  
TACGATACGGGAGGGCTTACCATCTGGCCCCAGTGTGCAATGATACCGCGAGACCCACGCTCACCGGCTCCAGATTTA  
TCAGCAATAAACCAGCCAGCCGGAAGGGCCGAGCGCAGAAGTGGTCTGCAACTTTATCCGCCTCCATCCAGTCTATTA  
ATTGTTGCCGGAAGCTAGAGTAAGTAGTTTCGCCAGTTAATAGTTTGCGCAACGTTGTTGCCATTGCTACAGGCATCGT

GGTGTACGCTCGTCGTTTTGGTATGGCTTCATTCAGCTCCGGTCCCAACGATCAAGGCGAGTTACATGATCCCCATG  
TTGTGCAAAAAAGCGTTAGCTCCTTCGGTCCCGATCGTTGTGAGAAGTAAGTTGGCCGCAGTGTTATCACTCATGG  
TTATGGCAGCACTGCATAATTCTTTACTGTGCATGCCATCCGTAAGATGCTTTTTCTGTGACTGGTGAGTACTCAACCAA  
GTCATTCTGAGAATAGTGTATGCGGCGACCGAGTTGCTCTTGCCCGGCGTCAATACGGGATAATACCGCGCCACATAGC  
AGAACTTTAAAAGTGCTCATCATTGAAAACGTTCTTCGGGGCGAAAACCTCTCAAGGATCTTACCGCTGTTGAGATCCA  
GTTTCGATGTAACCCACTCGTGCACCCAACTGATCTTCAGCATCTTTTACTTTTACCAGCGTTTTCTGGGTGAGCAAAAAC  
AGGAAGGCAAAATGCCGCAAAAAAGGGAATAAGGGCGACACGGAAATGTTGAATACTCATACTCTTCCTTTTTCAATAT  
TATTGAAGCATTATATCAGGGTTATTGTCTCATGAGCGGATACATATTTGAATGTATTTAGAAAAATAAACAAATAGGGG  
TTCCGCGCACATTTCCCGAAAAGTGCCACCTGAACGAAGCATCTGTGCTTCATTTTGTAGAACAAAAATGCAACGCGA  
GAGCGCTAATTTTTCAAACAAAGAATCTGAGCTGCATTTTTACAGAACAGAAATGCAACGCGAAAGCGCTATTTTTACCA  
ACGAAGAATCTGTGCTTCATTTTTGTAAAACAAAAATGCAACGCGAGAGCGCTAATTTTTCAAACAAAGAATCTGAGCT  
GCATTTTTACAGAACAGAAATGCAACGCGAGAGCGCTATTTTTACCAACAAAGAATCTATACTTCTTTTTTGTTCACAA  
AAATGCATCCCGAGAGCGCTATTTTTCTAACAAAGCATCTTAGATTACTTTTTTCTCCTTTGTGCGCTCTATAATGCA  
GTCTCTTGATAACTTTTTGCACTGTAGGTCCGTTAAGGTTAGAAGAAGGCTACTTTGGTGTCTATTTTTCTTCCATAA  
AAAAAGCCTGACTCCACTTCCCGCGTTTTACTGATTACTAGCGAAGCTGCGGGTGCATTTTTTCAAGATAAAGGCATCCC  
CGATTATATTCTATACCGATGTGGATTGCGCATACTTTGTGAACAGAAAGTGATAGCGTTGATGATTCTTCATTGGTCA  
GAAAATTATGAACGGTTTTCTTCTATTTTTGTCTCTATATACTACGTATAGGAAATGTTTACATTTTCGTATTGTTTTCGA  
TTCACTCTATGAATAGTTCTTACTACAATTTTTTTGTCTAAAGAGTAATACTAGAGATAAACATAAAAAATGTAGAGGT  
CGAGTTTAGATGCAAGTTCAAGGAGCGAAAGGTGGATGGGTAGGTTATATAGGGATATAGCACAGAGATATATAGCAAA  
GAGATACTTTTTGAGCAATGTTTGTGGAAGCGGTATTCGCAATATTTTAGTAGCTCGTTACAGTCCGGTGCCTTTTTGGT  
TTTTTGAAGTGCGTCTTCAGAGCGCTTTTGGTTTTTCAAAGCGCTCTGAAGTTCTATACTTTCTAGAGAATAGGAAC  
TTCGGAATAGGAACTTCAAAGCGTTTTCCGAAAACGAGCGCTTCCGAAAATGCAACGCGAGCTGCGCACATACAGCTCAC  
TGTTACGTCGCACCTATATCTGCGTGTTCCTGTATATATATATACATGAGAAGAACGGCATAGTGCGTGTATGCT  
TAAATGCGTACTTATATGCGTCTATTTATGTAGGATGAAAGGTAGTCTAGTACCTCCTGTGATATTATCCCATTCCATG  
CGGGGTATCGTATGCTTCCTTCAGCACTACCCTTTAGCTGTTCTATATGCTGCCACTCCTCAATTGGATTAGTCTCATC  
CTTCAATGCTATCATTTCTTTGATATTGGATCATATTAAGAAACCATTATTATCATGACATTAACCTATAAAAAATAGG  
CGTATCACGAGGCCCTTTTCGTC

>pMH02

TCGCGCGTTTTCGGTGATGACGGTGAAAACCTCTGACACATGCAGCTCCCGGAGACGGTACAGCTTGTCTGTAAGCGGA  
TGCCGGGAGCAGACAAGCCCCTCAGGGCGCGTTCAGCGGGTGTGGCGGGTGTGCGGGCTGGCTTAACTATGCGGCATCA  
GAGCAGATTGTACTGAGAGTGCACCATAAACGACATTACTATATATATAATATAGGAAGCATTTAATAGACAGCATCGT  
AATATATGTGTACTTTGACAGTTATGACGCCAGATGGCAGTAGTGGAAGATATTCTTTATTGAAAAATAGCTTGTACCT  
TACGTACAATCTTGATCCGGAGCTTTTCTTTTTTTGCGGATTAAGAATTAATTTCGGTCGAAAAAAGAAAAGGAGAGGGC  
CAAGAGGGAGGGCATTGGTGACTATTGAGCACGTGAGTATACGTGATTAAGCACACAAAGGCAGCTTGGAGTATGTCTG  
TTATTAATTTTACAGGTAGTTCTGGTCCATTGGTGAAAGTTTTGCGGCTTGACAGAGCACAGAGGCCGAGAATGTGCTCT  
AGATTCCGATGCTGACTTGTCTGGGTATTATATGTGTGCCCAATAGAAAGAGAACAATTGACCCGGTTATTGCAAGGAAA  
ATTTCAAGTCTTGTAAAAGCATATAAAAATAGTTTCAGGCCTCCGAAATACTTGGTTGGCGTGTTCGTAATCAACCTA  
AGGAGGATGTTTTGGCTCTGGTCAATGATTACGGCATTGATATCGTCCAATGCATGGAGATGAGTCGTGGCAAGAATA  
CCAAGAGTTCCTCGTTTTGCCAGTTATTAAGAAGACTCGTATTTCCAAAAGACTGCAACATACTACTCAGTGCAGCTTCA  
CAGAAACCTCATTCTGTTTTATTCCCTTGTGTTGATTGAGAAGCAGGTGGGACAGGTGAACTTTTGGATTGGAACCTCGATTT  
CTGACTGGGTTGGAAGGCAAGAGAGCCCCGAAAGCTTACATTTTTATGTTAGCTGGTGGACTGACGCCAGAAAATGTTGG  
TGATGCGCTTAGATTAAATGGCGTTATTGGTGTGATGTAAGCGGAGGTGTGGAGACAAATGGTGTAAAAGACTCTAAC  
AAAATAGCAAATTTTCGTCAAAAATGCTAAGAAATAGGTTATTACTGAGTAGTATTTATTTAAGTATTGTTTGTGCACTT  
GCCTATGCGGTGTGAAATACCGCACAGATGCGTAAGGAGAAAATACCGCATCAGGAAATGTAACGTTAATATTTTGT  
TAAAATTCGCGTTAAATTTTTGTTAAATCAGCTCATTTTTTAACCAATAGGCCGAAATCGGCAAAAATCCCTTATAAATC  
AAAAGAATAGACCGAGATAGGTTGAGTGTGTTCCAGTTTTGGAACAAGAGTCCACTATTAAGAACGTTGGACTCCAAC  
GTCAAAAGGGCGAAAAACCGTCTATCAGGGCGTACGGCCACTACGTGAACCATCACCCTAATCAAGTTTTTTTTGGGGTCGA  
GGTGCCGTAAAGCACTAAATCGGAACCCTAAAGGGAGCCCCCGATTTAGAGCTTGACGGGGAAAGCCGGCGAACGTGGC  
GAGAAAGGAAGGGAAGAAAGCGAAAGGAGCGGGCGCTAGGGCGCTGGCAAGTGTAGCGGTACGCTGCGCGTAACCACC  
ACACCCGCCGCGCTTAATGCGCCGCTACAGGGCGCGTTCGCGCCATTTCAGGCTGCGCAACTGTTGGGAAGGGC  
GATCGGTGCGGGCTCTTCGCTATTACGCCAGCTGGCGAAAGGGGGATGTGCTGCAAGGCGATTAAGTTGGGTAACGCC  
AGGGTTTTCCAGTCACGACGTTGTAAAACGACGGCCAGTGAGCGCGCGTAATACGACTCACTATAGGGCGAATTGGGT  
ACCGGGCCCCCTCGAGGTCGACGGTATCGATAAGCTTGATATCGAATTCCTGCAGCCCGGGGGATCCACTAGTTCTA  
GAGCGGCCGCCACCGCGGTGGAGCTCCAGCTTTTTGTTCCCTTTAGTGAGGGTTAATTGCGCGCTTGGCGTAATCATGGT  
CATAGCTGTTTTCTGTGTGAAATTTGTTATCCGCTCACAATTCACACAACATAGGAGCCGGAAGCATAAAGTGTAAAGC  
CTGGGGTGCCTAATGAGTGAGGTAACCTCACATTAATTGCGTTGCGCTCACTGCCCGCTTTCCAGTCGGGAAACCTGTCTG  
TGCCAGCTGCATTAATGAATCGGCCAACGCGCGGGGAGAGGCGGTTTTGCGTATTGGGCCAGTGTGATGGATATCTGCAG  
AATTCGCCCTTctagaaaaccgtaccaggtgaactgtttaattggaggatacgatgtaagacaaatcagccgtcgttg  
aattggatagattattaggtacgcaagttgaacgtccttatgggtgctcatggctacgcagcattttacacaacatcct  
tgtagataaacattatagaaaggacatgacagttgaagatggtttgaagttaatggacatgtgtgtcaaagaattaca  
aacgagaatgccattgattttaaaggtgtgtacatcaaggtggtagataaagatggtataagacagattgagtcaaat  
tgaagtaaatctataagtatgtatatatagtattttattaaactctacaatttgatatctcgagcaccataatctgt  
tgcgccagctttcttcaattcatccattacattaccaatttcctttctgttaaccatggaagaaatggcaaccagtc  
tcttcgtcgtcactgtgtttatccaaagtggagacagtggtgctgccttctacctggagtaattggttaagcactttgatt

gaatggattttggagcattgtagttacacaagacatattcctgagccgctaaaacaccttgaagtccttggacaattat  
gttgaccatttctggaatttgggttttcttggaggaaatcaaagagcggaggttccaatatgggttcgatcgccttt  
aatccagcagctttcatggctctccactttcaactaaatcgacaatggcgtcggcaacacccaatgcgcaagaagcct  
caactgaaccaccaacgtatctaataattcgtaggtttgcggataaatttctgaaatagtcagtactcaactttgtaaa  
ggaggatacaatcttcttccaacgagttgttcgggttttctgactcgccatttgcaggaacttggatctgcaattta  
catgagccaaacttcaaatccaacaaatcctcaatgttgtcgaattgggtctgcttcttggatctgggtctaaccagtta  
tacccaagtcacaattaccttctccaacgaaaactggaatatcggtcgcaggcaaaaagattaatgcaattggcaagtt  
tgtggaaagggcaatatccaatctattagatcttctaaactgtatatcggcaccgctcaataagctgcagcatttttca  
tataatctgccccttttgggaacagcaaataacaaacgatcgggcaaatgattgactaaatccatagtgaaatgtagg  
tggtgttagaagaaaagtggtatataatttgggtgtgggaaaaatcttcaccaaaaaaaaaaaaaaaaaataaaaaaatttcaa  
tgactcaatacattttttttgtaccctgtatcgctttgagacacgtttcaaagaaacacctgaaataaacaaggtgta  
cgtttcaaaaaaaaaaaaaaaaaactattgaataaataaaaatactgtcctattacttttgcctatatcttcaacatcttc  
ttcttcggatgtcactgtatcctcttcagttcctaaattgttactactaacttcgggtctcttcgctcctccaggtaccgg  
tcaagccctgtagctccatttgggtgtgtttattaattcttcttccatttgggtcttccactaccaagttattactaacc  
catatccatttgggtttccatacatgtatgtttaaaccctcagttgagtaaaatcttgagcatatcccatgggtctaga  
atgcccggccataacttgtcgcacaaacacaactgcacaatctggcgacaccgtttgcataaaaagaaagtctgaaagtct  
aatgttctctgatgttcttactagtaaatccaatgggggcacatcttctgataaaagatgcttgtcgatagcctcctcg  
gttatttcaataccaccttctcgtcgttctcgtctactactgacttgatcagatgggttatctcgtctcttgatgtatatg  
ggaagcagacattcaacacagcagcgttattgttttttagttatttcttcgggttcttcaaggatctctaacacatcttt  
cggcaaaagtttgggtatttcttaataattctgattttaaccccatactcctcacacaacaatccatgttgggtttatttgc  
gtaaacttggatttggctaattccatcaaccatttgacctcatattgacgtctcttgaagttttcgatcgaaaatgcat  
aaacggtggcacatttcacaccagctcgtataataattctagtatgcttggcatggtatcaaacAAGGGCGAATTCCA  
GCACACTGGCGGCTGACTCGCTGCGCTCGGTCGTTTCGGCTGCGGCGAGCGGTATCAGCTCACTCAAAGGCGGTAATACG  
GTTATCCACAGAATCAGGGGATAACGCAGGAAAGAACATGTGAGCAAAAAGGCCAGCAAAAAGGCCAGGAACCGTAAAAAG  
GCCGCGTTGCTGGCGTTTTTCCATAGGCTCCGCCCCCTGACGAGCATCAGCAAAAATCGACGCTCAAGTCAGAGGTGGC  
GAAACCCGACAGGACTATAAAGATAACCAGGCGTTTTCCCCCTGGAAGCTCCCTCGTGCGCTCTCCTGTTCCGACCCTGCC  
GCTTACCGGATACCTGTCCGCTTTTCTCCCTTCGGAAGCGTGGCGTTTTCTCATAGCTCACGCTGTAGGTATCTCAGT  
TCGGTGTAGGTCTGTTCCGCTCCAAGCTGGGCTGTGTGCACGAACCCCCGTTTCAGCCCGACCGCTGCGCCTTATCCGGTA  
ACTATCGTCTTGAGTCCAACCCGGTAAGACACGACTTATCGCCACTGGCAGCAGCCACTGGTAACAGGATTAGCAGAGC  
GAGGTATGTAGGCGGTGCTACAGAGTTCTTGAAGTGGTGGCCTAACTACGGCTACACTAGAAGGACAGTATTTGGTATC  
TGCGCTCTGCTGAAGCCAGTTACCTTCGAAAAAGAGTTGGTAGCTCTTGATCCGGCAAACAAACCACCGCTGGTAGCG  
GTGGTTTTTTTTGTTTGAAGCAGCAGATTACGCGCAGAAAAAAGGATCTCAAGAAGATCCTTTGATCTTTTTCTACGGG  
GTCTGACGCTCAGTGGAACGAAAACCTCACGTTAAGGGATTTTTGGTTCATGAGATTATCAAAAAGGATCTTACCTAGATC  
CTTTTAAATTAATAAATGAAGTTTTAAATCAATCTAAAGTATATATGAGTAAACTTGGTCTGACAGTTACCAATGCTTAA  
TCAGTGAGGCACCTATCTCAGCGATCTGTCTATTTCTGTTTCATCCATAGTTGCCTGACTCCCCGTCTGTAGATAACTAC  
GATACGGGAGGGCTTACCATCTGGCCCCAGTGTGCAATGATACCGCGAGACCCACGCTCACCGGCTCCAGATTTATCA  
GCAATAAACAGCCAGCCGGAAGGGCCGAGCGCAGAAGTGGTCTGCAACTTTATCCGCCTCCATCCAGTCTATTAATT  
GTTGCCGGGAAGCTAGAGTAAGTAGTTCCGCAAGTTAATAGTTTGCGCAACGTTGTTGCCATTGCTACAGGCATCGTGGT

GTCACGCTCGTCGTTTTGGTATGGCTTCATTTCAGCTCCGGTTCCCAACGATCAAGGCGAGTTACATGATCCCCATGTTG  
TGCAAAAAAGCGTTAGCTCCTTCGGTCCTCCGATCGTTTGTGAGAAGTAAGTTGGCCGCGAGTGTATCACTCATGGTTA  
TGGCAGCACTGCATAATTCTCTTACTGTATGCCATCCGTAAGATGCTTTTTCTGTGACTGGTGAGTACTCAACCAAGTC  
ATTCTGAGAATAGTGTATGCGGCGACCGAGTTGCTCTTGCCCGGCGTCAATACGGGATAATACCGCGCCACATAGCAGA  
ACTTTAAAAGTGCTCATCATTGGAAAACGTTCTTCGGGGCGAAAACCTCTCAAGGATCTTACCGCTGTTGAGATCCAGTT  
CGATGTAACCCACTCGTGCACCCAACTGATCTTCAGCATCTTTTACTTTTACCAGCGTTTTCTGGGTGAGCAAAAAACAGG  
AAGGCAAAATGCCGCAAAAAAGGGAATAAGGGCGACACGGAAATGTTGAATACTCATACTCTTCCTTTTTTCAATATTAT  
TGAAGCATTATCAGGGTTATTGTCTCATGAGCGGATACATATTTGAATGTATTTAGAAAAATAAACAAATAGGGGTTT  
CGCGCACATTTCCCGAAAAGTGCCACCTGAACGAAGCATCTGTGCTTCATTTTGTAGAACAAAAATGCAACGCGAGAG  
CGCTAATTTTTCAAACAAAGAATCTGAGCTGCATTTTTACAGAACAGAAATGCAACGCGAAAGCGCTATTTTTACCAACG  
AAGAATCTGTGCTTCATTTTTGTAAAACAAAAATGCAACGCGAGAGCGCTAATTTTTCAAACAAAGAATCTGAGCTGCA  
TTTTTACAGAACAGAAATGCAACGCGAGAGCGCTATTTTTACCAACAAAGAATCTATACTTCTTTTTTGTCTACAAAA  
TGCATCCCGAGAGCGCTATTTTTCTAACAAGCATCTTAGATTACTTTTTTCTCCTTTGTGCGCTCTATAATGCAGTC  
TCTTGATAACTTTTTGCACTGTAGGTCCGTTAAGGTTAGAAGAAGGCTACTTTGGTGTCTATTTTTCTCTCCATAAAAA  
AAGCCTGACTCCACTTCCCGCGTTTTACTGATTACTAGCGAAGCTGCGGGTGCATTTTTTCAAGATAAAGGCATCCCCGA  
TTATATTCTATACCGATGTGGATTGCGCATACTTTGTGAACAGAAAGTGATAGCGTTGATGATTCTTCATTGGTCAGAA  
AATTATGAACGGTTTTCTTCTATTTTTGTCTCTATATACTACGTATAGGAAATGTTTACATTTTCGTATTGTTTTCGATT  
ACTCTATGAATAGTTCTTACTACAATTTTTTGTCTAAAGAGTAATACTAGAGATAAACATAAAAAATGTAGAGGTGCA  
GTTTATAGATGCAAGTTCAAGGAGCGAAAGGTGGATGGGTAGGTTATATAGGGATATAGCACAGAGATATATAGCAAAGAG  
ATACTTTTGGAGCAATGTTTGTGGAAGCGGTATTCGCAATATTTTTAGTAGCTCGTTACAGTCCGGTGCCTTTTTGGTTTT  
TTGAAAGTGCGTCTTCAGAGCGCTTTTTGGTTTTCAAAGCGCTCTGAAGTTCTATACTTTCTAGAGAATAGGAACTTC  
GGAATAGGAACTTCAAAGCGTTTTCCGAAAACGAGCGCTTCCGAAAATGCAACGCGAGCTGCGCACATACAGCTCACTGT  
TCACGTCGCACCTATATCTGCGTGTTGCCTGTATATATATATACATGAGAAGAACGGCATAGTGCCTGTTTATGCTTAA  
ATGCGTACTTATATGCGTCTATTTATGTAGGATGAAAGGTAGTCTAGTACCTCCTGTGATATTATCCCATTCCATGCGG  
GGTATCGTATGCTTCCTTCAGCACTACCCTTTAGCTGTTCTATATGCTGCCACTCCTCAATTGGATTAGTCTCATCCTT  
CAATGCTATCATTTCCTTTGATATTGGATCATATTAAGAAACCATTATTATCATGACATTAACCTATAAAAAATAGGCGT  
ATCACGAGGCCCTTTTCGTC

>pMH03

GAATTCTGAACCAGTCTCTAAAACGAGTAAATAGGACCGCAATTCTTCAAGCAATAAACAGGAATACCAATTATTTAAAA  
GATAACTTAGTCAGATCGTACAATAAAGCTTTGAAGAAAAATGCGCCTTATTCAATCTTTGCTATAAAAAATGGCCCAA  
AATCTCACATTGGAAGACATTTGATGACCTCATTTCTTTCAATGAAGGGCCTAACGGAGTTGACTAATGTTGTGGGAAA  
TTGGAGCGATAAGCGTGCTTCTGCCGTGGCCAGGACAACGTATACTCATCAGATAACAGCAATACCTGATCACTACTTC  
GCACTAGTTTCTCGGTACTATGCATATGATCCAATATCAAAGGAAATGATAGCATTGAAGGATGAGACTAATCCAATTG  
AGGAGTGGCAGCATATAGAACAGCTAAAGGGTAGTGCTGAAGGAAGCATAACGATAACCCCGCATGGAATGGGATAATATC  
ACAGGAGGTACTAGACTACCTTTTCATCCTACATAAATAGACGCATATAAGTACGCATTTAAGCATAAACACGCCTATG  
CCGTTCTTCTCATGTATATATATATACAGGCAACACGCAGATATAGGTGCGACGTGAACAGTGAGCTGTATGTGCGCAG  
CTCGCGTTGCATTTTTCGGAAGCGCTCGTTTTTCGGAACGCTTTGAAGTTCCTATTCCGAAGTTCCTATTCTCTAGAAAG  
TATAGGAACCTTCAGAGCGCTTTTGA AACCCAAAAGCGCTCTGAAGACGCATTTTCAAAAAACCAAAAACGCACCGGACT  
GTAACGAGCTACTAAAATATTGCGAATACCGCTTCCACAAACATTGCTCAAAAAGTATCTCTTTGCTATATATCTCTGTG  
CTATATCCCTATATAACCTACCCATCCACCTTTTCGCTCCTTGAACCTTGCATCTAAACTCGACCTCTACATTTTTTATGT  
TTATCTCTAGTATTACTCTTTTAGACAAAAAATTGTAGTAAGAACTATTTCATAGAGTGAATCGAAAAAATACGAAAAAT  
GTAAACATTTCTTATACGTAGTATATAGAGACAAAATAGAAGAAACCGTTCATAATTTTCTGACCAATGAAGAATCATC  
AACGCTATCACTTTCTGTTTACAAAAGTATGCGCAATCCACATCGGTATAGAATATAATCGGGGATGCCTTTATCTTGAA  
AAAATGCACCCGCAGCTTCGCTAGTAATCAGTAAACGCGGGAAGTGGAGTCAGGCTTTTTTTTATGGAAGAGAAAAATAGA  
CACCAAAGTAGCCTTCTTCTAACCTTAACGGACCTACAGTGCAAAAAGTTATCAAGAGACTGCATTATAGAGCGCACAA  
AGGAGAAAAAAATAATCTAAGATGCTTTGTTAGAAAAATAGCGCTCTCGGGATGCATTTTTTGTAGAACAAAAAGAAG  
TATAGATTTCTTTGGTAAAATAGCGCTCTCGCGTTGCATTTCTGTTCTGTAAAATGCAGCTCAGATTCTTTGTTTG  
AAAAATTAGCGCTCTCGCGTTGCATTTTTGTTTTACAAAATGAAGCACAGATTCTTCGTTGGTAAAATAGCGCTTTTCG  
CGTTGCATTTCTGTTCTGTAAAATGCAGCTCAGATTCTTTGTTTGA AAAAATTAGCGCTCTCGCGTTGCATTTTTGTTT  
TACAAAATGAAGCACAGATGCTTTCGTTAACAAAAGATATGCTATTGAAGTGCAAGATGGAAACGCAGAAAATGAACCGGG  
GATGCGACGTGCAAGATTACCTATGCAATAGATGCAATAGTTTCTCCAGGAACCGAAATACATACATTGTCTTCCGTAA  
AGCGCTAGACTATATATTATTATACAGGTTCAAATATACTATCTGTTTTCAGGGAAAACCTCCAGGTTCCGGATGTTCAA  
ATTCAATGATGGGTAACAAGTACGATCGTAAATCTGTAAAACAGTTTGTTCGGATATTAGGCTGTATCTCCTCAAAGCGT  
ATTCGAATATCATTGAGAAGCTGCAGCGTCACATCGGATAATAATGATGGCAGCCATTGTAGAAGTGCCTTTTGCATTT  
CTAGTCTCTTTCTCGGTCTAGCTAGTTTTACTACATCGCGAAGATAGAATCTTAGATCACACTGCCTTTGCTGAGCTGG  
ATCAATAGAGTAACAAAAGAGTGGTAAGGCCTCGTTAAAGGACAAGGACCTGAGCGGAAGTGTATCGTACAGTAGACGG  
AGTATACTAGTATAGTCTATAGTCCGTGGAATTCATGTTTTGACAGCTTATCATCGATAAGCTTTTCAATTC AATTCA  
TCATTTTTTTTTTATTCTTTTTTTTTGATTTTCGGTTTTCTTTGAAATTTTTTTGATTCGGTAATCTCCGAACAGAAGGAAG  
AACGAAGGAAGGAGCACAGACTTAGATTGGTATATATACGCATATGTAGTGTTGAAGAAACATGAAATTGCCAGTATT  
CTTAACCCAACCTGCACAGAACAAAAACCTGCAGGAAACGAAGATAAATCATGTGCAAGCTACATATAAGGAACGTGCT  
GCTACTCATCCTAGTCCTGTTGCTGCCAAGCTATTTAATATCATGCACGAAAAGCAAACAACTTGTGTGCTTCATTGG  
ATGTTTCGTACCACCAAGGAATTACTGGAGTTAGTTGAAGCATTAGGTCCCAAAATTTGTTTACTAAAAACACATGTGGA  
TATCTTGACTGATTTTTCCATGGAGGGCACAGTTAAGCCGCTAAAGGCATTATCCGCCAAGTACAATTTTTTACTCTTC  
GAAGACAGAAAATTTGCTGACATTGGTAATACAGTCAAATTCAGTACTCTGCGGGTGTATACAGAATAGCAGAATGGG

CAGACATTACGAATGCACACGGTGTGGTGGGCCAGGTATTGTTAGCGGTTTGAAGCAGGCGGCAGAAGAAGTAACAAA  
GGAACCTAGAGGCCCTTTTGTATGTTAGCAGAATTGTCATGCAAGGGCTCCCTATCTACTGGAGAATATACTAAGGGTACT  
GTTGACATTGCGAAGAGCGACAAAAGATTTTTGTTATCGGCTTTATTGCTCAAAGAGACATGGGTGGAAGAGATGAAGGTT  
ACGATTGGTTGATTATGACACCCGGTGTGGGTTTAGATGACAAGGGAGACGCATTGGGTCAACAGTATAGAACCGTGGA  
TGATGTGGTCTCTACAGGATCTGACATTATTATTGTTGGAAGAGGACTATTTGCAAAGGGAAGGGATGCTAAGGTAGAG  
GGTGAACGTTACAGAAAAGCAGGCTGGGAAGCATATTTGAGAAGATGCGGCCAGCAAACTAAAAAAGTATTATAAG  
TAAATGCATGTATACTAACTCACAAATTAGAGCTTCAATTTAATTATATCAGTTATTACCCGGGAATCTCGGTCGTAA  
TGATTTTTATAATGACGAAAAAAAAAATTTGAAAGAAAAAGCTTTAATGCGGTAGTTTATCACAGTTAAATTGCTAA  
CGCAGTCAGGCACCGTGTATGAAATCTAACAATGCGCTCATCGTCATCCTCGGCACCGTCACCCTGGATGCTGTAGGCA  
TAGGCTTGGTTATGCCGGTACTGCCGGCCCTCTTGCGGGATATCGTCCATTCCGACAGCATCGCCAGTCACTATGGCGT  
GCTGCTAGCGCTATATGCGTTGATGCAATTTCTATGCGCACCCGTTCTCGGAGCACTGTCCGACCGCTTTGGCCGCCGC  
CCAGTCTGCTCGCTTCGCTACTTGGAGCCACTATCGACTACGCGATCATGGCGACCACACCCGCCAGTGTGCTGGAAT  
TCGCCCTTggatccaatcatcactgggtgggggtcaagaaagaggtttgagatcaggtactttggcaccaccattagtag  
ctggggtttgggtgaagctgcaagattaatgaaacaagaatctgcatgacaagaacatattgagaggttatctactaa  
attgaagaacgggtttggtatccattccatctactcagtttaacgggtgtaataaccaacatataataccagggttgt  
gtgaatgtttcctttgcatacattgaaggggaatccttggtaatggcattgaaagatattgcattgagttctgggtctg  
catgtacctctgcatctttggaaccatcgtatgtttacatgctttgggtgccgatgatgccttggctcattcttccat  
tagattcgggtattggtagattcaccactgaagcagaagttgactatgttattcaagcaattaatgaaagagttgatttc  
ttgagaaagatgtctccattatgggaaatgggtcaagaaggtattgacttgaactctatcgaatggagtggacattaag  
gttttttggttttttgtaatttggtgtgttatgtgtaattatcgtgtatagagtaatttcggaaattgtactttcgttc  
atgtatctgaaccagatgaataatcgttcgtatgttgaagaatgactaactcctgtaacggcgtgcgtgggttccgc  
agccgggttcaattttttttttttcttctcactataaaaaatataataaacgaaaaaaatccgagggactcaggctatg  
aaatttttcactcaagaatttttttttcttccatccttaattcctttattcactaccctaaaccacaatgtcagttaaaa  
ctaaaactattacaattttaccagggtgatcacgtcgggtaccgaaattgtcaatgaagctatcaaagttttagaagcaat  
tgaagctgccactccttaccaaaaaatccatttcgatttcaaacatcatttaatecgggtgggtgctgccattgatgccact  
gggtgctccattgccagatgacgcacttgaagtgccaaaaaatctgatgccgtcttattgggtgctgttgggtggaccaa  
aatgggggactggcgccgttctgctccagaacaagggtttattaaagattcgtaaagaattgaacctttatgctaaccatcag  
accatgtaactttgccagtgactccttattggaattatccccattgagaccagaagtcgttaaaggtaaaaacttgatc  
attgttcgtgaattagttgggtgggtatttatttcgggtgatcgtgaagaacaagaagaaagtgaaagataaaacaaaccgcat  
gggatactgaaaaatacaccgtcgatgaagtcaccagaatcaccgctatggctgccttcatggctttacaacataacc  
accattaccaatctgggtcattggataaggctaattgttttagcttcttctagattatggagaagaactgtcgataaagtg  
atctctgaagagttcccaactttgtctgttcaacatcaattgattgactccgcccgatgattttaattcaaaacc  
ccaaattgaaatgggtataatcatcacttcaacatggttgggtgatcatttccgatgaagcttcagttattccagggtc  
cttgggtttattaccatctgcatctttggcttcattgcccagataccaacaccgcttttgggtctttatgaaccatgtcac  
gggtctgctcctgatccaccagccaataaaggttaaccaatgctactatcttctgctgcttctatggtgagattat  
ctttggattgtgtgaaagaagctgaagctttagaagaagccgtgaaacaagtcttgataaagggtatcagaactgcaga  
tttaagaggtaccagttcagctactgaagttgggtgacgcgattgtcgaagctgttactaaaatcttaaaagaaaaagct  
taagtaaagtatacacaaaatttaacgaatattattaatacaaaaatgaacaccacctaataacttttttttaaaaatgt

accgactcttctaaaaattgcgataattcaatatcgaaaatttctctcaccggtttacttggatcttcggaaataaatc  
tatttgaagtaatggtagcctcacttgattctgattggctcttcttagacatgggtaggtAAGGGCGAATTCTGCAGAT  
ATCCATCACACTGGCGACGCATCGTGGCCGGCATCACCGGCGCCACAGGTGCGGTTGCTGGCGCCTATATCGCCGACAT  
CACCGATGGGGAAGATCGGGCTCGCCACTTCGGGCTCATGAGCGCTTGTTTTCGGCGTGGGTATGGTGGCAGGCCCGTG  
GCCGGGGGACTGTTGGGCGCCATCTCCTTGATGCACCATTCTTGGCGGCGGGTCTCAACGGCCTCAACCTACTAC  
TGGGCTGCTTCCTAATGCAGGAGTCGCATAAGGGAGAGCGTCGACCGATGCCCTTGAGAGCCTTCAACCCAGTCAGCTC  
CTTCCGGTGGGCGCGGGGCATGACTATCGTCCGCGACTTATGACTGTCTTCTTTATCATGCAACTCGTAGGACAGGTG  
CCGGCAGCGCTCTGGGTCATTTTGGGCGAGGACCGCTTTCGCTGGAGCGCGACGATGATCGGCCTGTGCTTGGCGTAT  
TCGGAATCTTGCACGCCCTCGCTCAAGCCTTCGTCACTGGTCCC GCCACCAAACGTTTTCGGCGAGAAGCAGGCCATTAT  
CGCCGGCATGGCGGCCGACGCGCTGGGCTACGTCTTGGTGGCGTTCCGCGACGCGAGGCTGGATGGCCTTCCCCATTATG  
ATTCTTCTCGCTTCCGGCGGCATCGGGATGCCCGGTTGCAGGCCATGCTGTCCAGGCAGGTAGATGACGACCATCAGG  
GACAGCTTCAAGGATCGCTCGCGGCTCTTACCAGCCTAACTTCGATCACTGGACCGCTGATCGTACGGCGATTTATGC  
CGCCTCGGCGAGCACATGGAACGGGTTGGCATGGATTGTAGGCGCCGCCCTATACCTTGTCTGCCTCCCCGCGTTGCGT  
CGCGGTGCATGGAGCCGGGCCACCTCGACCTGAATGGAAGCCGGCGGCACCTCGCTAACGGATTACC ACTCCAAGAAT  
TGGAGCCAATCAATTCTTGGCGAGA ACTGTGAATGCGCAAACCAACCTTGGCAGAACATATCCATCGCGTCCGCCATC  
TCCAGCAGCCGCACGCGGGCGCATCTCGGGCAGCGTTGGGTCTGGCCACGGGTGCGCATGATCGTGCTCCTGTGCTTGA  
GGACCCGGCTAGGCTGGCGGGGTTGCCTTACTGGTTAGCAGAATGAATCACCGATACGCGAGCGAACGTGAAGCGACTG  
CTGCTGCAAAACGTCTGCGACCTGAGCAACAACATGAATGGTCTTCCGTTTTCCGTGTTTTCGTAAAGTCTGGAAACGCGG  
AAGTCAGCGCCCTGCACCATTATGTTCCGGATCTGCATCGCAGGATGCTGCTGGCTACCCTGTGGAACACCTACATCTG  
TATTAACGAAGTACTGGCATTGACCCTGAGTGATTTTTCTCTGGTCCCGGCATCCATAACCGCCAGTTGTTTTACCCTC  
ACAACGTTCCAGTAACCGGCATGTTTATCATCAGTAACCCGATCGTGAGCATCCTCTCTCGTTTTATCGGTATCATT  
ACCCCCATGAACAGAAATTTCCCTTACACGGAGGCATCAAGTACCAAACAGGAAAAAACCGCCCTTAACATGGCCCCG  
CTTTATCAGAAGCCAGACATTAACGCTTCTGGAGAAACTCAACGAGCTGGACGCGGATGAACAGGCAGACATCTGTGAA  
TCGCTTACAGACCAGCTGATGAGCTTTACCGCAGCTGCCTCGCGCGTTTTCGGTGATGACGGTGAAAACCTCTGACACA  
TGCAGCTCCCGGAGACGGTCACAGCTTGTCTGTAAGCGGATGCCGGGAGCAGACAAGCCCGTCAGGGCGCGTCAGCGGG  
TGTTGGCGGGTGTGGGGCGCAGCCATGACCCAGTCACGTAGCGATAGCGGAGTGTATACTGGCTTAACTATGCGGCAT  
CAGAGCAGATTGTA CTGAGAGTGCACCATATGCGGTGTGAAATACCGCACAGATGCGTAAGGAGAAAATACCGCATCAG  
GCGCTCTTCCGCTTCTCGCTCACTGACTCGCTGCGCTCGGTCTGTTCCGGTGCGGCGAGCGGTATCAGCTCACTCAAAG  
GCGGTAATACGGTTATCCACAGAATCAGGGGATAACGCAGGAAAGAACATGTGAGCAAAAGGCCAGCAAAAGGCCAGGA  
ACCGTAAAAAGGCCGCGTTGCTGGCGTTTTTCCATAGGCTCCGCCCCCTGACGAGCATCACAAAATCGACGCTCAAG  
TCAGAGGTGGCGAAACCCGACAGGACTATAAAGATACCAGGCGTTTTCCCTGGAAGCTCCCTCGTGCGCTCTCCTGTT  
CCGACCCTGCCGCTTACCGGATACCTGTCCGCCTTTCTCCCTTCCGGAAAGCGTGGCGCTTTCTCATAGCTCACGCTGTA  
GGTATCTCAGTTCGGTGTAGGTCGTTCCGCTCCAAGCTGGGCTGTGTGCACGAACCCCCCGTTCAGCCCCGACCGCTGCGC  
CTTATCCGGTAACTATCGTCTTGAGTCCAACCCGGTAAGACACGACTTATCGCCACTGGCAGCAGCCACTGGTAACAGG  
ATTAGCAGAGCGAGGTATGTAGGCGGTGCTACAGAGTCTTGAAGTGGTGGCCTAACTACGGCTACACTAGAAGGACAG  
TATTTGGTATCTGCGCTCTGCTGAAGCCAGTTACCTTCCGAAAAAGAGTTGGTAGCTCTTGATCCGGCAAACAAACCAC  
CGCTGGTAGCGGTGGTTTTTTTTGTTTGAAGCAGCAGATTACGCGCAGAAAAAAGGATCTCAAGAAGATCCTTTGATC  
TTTTCTACGGGTCTGACGCTCAGTGAACGAAAACCTCACGTTAAGGGATTTTGGTCATGAGATTATCAAAAAGGATCT

TCACCTAGATCCTTTTTAAATTA AAAATGAAGTTTTAAATCAATCTAAAGTATATATGAGTAAACTTGGTCTGACAGTTA  
CCAATGCTTAATCAGTGAGGCACCTATCTCAGCGATCTGTCTATTTTCGTTTCATCCATAGTTGCCTGACTCCCCGTCGTG  
TAGATAACTACGATACGGGAGGGCTTACCATCTGGCCCCAGTGCTGCAATGATACCGCGAGACCCACGCTCACCGGCTC  
CAGATTTTATCAGCAATAAAACCAGCCAGCCGGAAGGGCCGAGCGCAGAAGTGGTCCTGCAACTTTATCCGCCTCCATCCA  
GTCTATTAATTGTTGCCGGAAGCTAGAGTAAGTAGTTTCGCCAGTTAATAGTTTTCGCAACGTTGTTGCCATTGCTGCA  
GGCATCGTGGTGTACGCTCGTCTGTTTGGTATGGCTTCATTCAGCTCCGGTTCCCAACGATCAAGGCGAGTTACATGAT  
CCCCATGTTGTGCAAAAAAGCGGTTAGCTCCTTCGGTCTCCGATCGTTGTGAGAAGTAAGTTGGCCGCAGTGTTATC  
ACTCATGGTTATGGCAGCACTGCATAATTCTCTTACTGTTCATGCCATCCGTAAGATGCTTTTCTGTGACTGGTGAGTAC  
TCAACCAAGTCATTCTGAGAATAGTGTATGCGGCGACCGAGTTGCTCTTGCCCGGCGTCAACACGGGATAATACCGCGC  
CACATAGCAGAACTTTAAAAGTGCTCATCATTGGAAAACGTTCTTCGGGGCGAAAACCTCTCAAGGATCTTACCGCTGTT  
GAGATCCAGTTTCGATGTAACCCACTCGTGCACCCAACTGATCTTCAGCATCTTTTACTTTTACCAGCGTTTCTGGGTGA  
GCAAAAACAGGAAGGCAAAATGCCGCAAAAAGGGAATAAGGGCGACACGGAATGTTGAATACTCATACTCTTCCTTT  
TTCAATATTATTGAAGCATTTATCAGGGTTATTGTCTCATGAGCGGATACATATTTGAATGTATTTAGAAAAATAACA  
AATAGGGGTTCCGCGCACATTTCCCCGAAAAGTGCCACCTGACGTCTAAGAAACCATTATTATCATGACATTAACCTAT  
AAAAATAGGCGTATCACGAGGCCCTTTTCGTCTTCAA

>pMH04

GAATTCTGAACCAGTCTCTAAAACGAGTAAATAGGACCGCAATTCTTCAAGCAATAAACAGGAATACCAATTATTTAAAA  
GATAACTTAGTCAGATCGTACAATAAAGCTTTGAAGAAAAATGCGCCTTATTCAATCTTTGCTATAAAAAAATGGCCCAA  
AATCTCACATTGGAAGACATTTGATGACCTCATTTCTTTCAATGAAGGGCCTAACGGAGTTGACTAATGTTGTGGGAAA  
TTGGAGCGATAAGCGTGCTTCTGCCGTGGCCAGGACAACGTATACTCATCAGATAACAGCAATACCTGATCACTACTTC  
GCACTAGTTTCTCGGTACTATGCATATGATCCAATATCAAAGGAAATGATAGCATTGAAGGATGAGACTAATCCAATTG  
AGGAGTGGCAGCATATAGAACAGCTAAAGGGTAGTGCTGAAGGAAGCATAACGATAACCCCGCATGGAATGGGATAATATC  
ACAGGAGGTACTAGACTACCTTTTCATCCTACATAAATAGACGCATATAAGTACGCATTTAAGCATAAACACGCCTATG  
CCGTTCTTCTCATGTATATATATATACAGGCAACACGCAGATATAGGTGCGACGTGAACAGTGAGCTGTATGTGCGCAG  
CTCGCGTTGCATTTTTCGGAAGCGCTCGTTTTTCGGAACGCTTTGAAGTTCCTATTCCGAAGTTCCTATTCTCTAGAAAG  
TATAGGAACCTTCAGAGCGCTTTTGA AACCCAAAAGCGCTCTGAAGACGCATTTTCAAAAAACCAAAAACGCACCCGGACT  
GTAACGAGCTACTAAAATATTGCGAATACCGCTTCCACAAACATTGCTCAAAAAGTATCTCTTTGCTATATATCTCTGTG  
CTATATCCCTATATAACCTACCCATCCACCTTTTCGCTCCTTGAACCTTGCATCTAAACTCGACCTCTACATTTTTTATGT  
TTATCTCTAGTATTACTCTTTTAGACAAAAAATTGTAGTAAGAACTATTTCATAGAGTGAATCGAAAAAATACGAAAAAT  
GTAAACATTTCTTATACGTAGTATATAGAGACAAAATAGAAGAAACCGTTCATAATTTTCTGACCAATGAAGAATCATC  
AACGCTATCACTTTCTGTTCCACAAAGTATGCGCAATCCACATCGGTATAGAATATAATCGGGGATGCCTTTATCTTGAA  
AAAATGCACCCGCAGCTTCGCTAGTAATCAGTAAACGCGGGAAGTGGAGTCAGGCTTTTTTTTATGGAAGAGAAAAATAGA  
CACCAAAGTAGCCTTCTTCTAACCTTAACGGACCTACAGTGCAAAAAGTTATCAAGAGACTGCATTATAGAGCGCACAA  
AGGAGAAAAAATAATCTAAGATGCTTTGTTAGAAAAATAGCGCTCTCGGGATGCATTTTTTGTAGAACAAAAAAGAAG  
TATAGATTTCTTTGTTGGTAAAAATAGCGCTCTCGCGTTGCATTTCTGTTCTGTAAAAATGCAGCTCAGATTTCTTTGTTG  
AAAAATTAGCGCTCTCGCGTTGCATTTTTGTTTTACAAAAATGAAGCACAGATTCTTCGTTGGTAAAAATAGCGCTTTTCG  
CGTTGCATTTCTGTTCTGTAAAAATGCAGCTCAGATTCTTTGTTTGA AAAAATTAGCGCTCTCGCGTTGCATTTTTGTTT  
TACAAAATGAAGCACAGATGCTTTCGTTAACAAAGATATGCTATTGAAGTGCAAGATGGAAACGCAGAAAAATGAACCGGG  
GATGCGACGTGCAAGATTACCTATGCAATAGATGCAATAGTTTCTCCAGGAACCGAAATACATACATTGTCTTCCGTAA  
AGCGCTAGACTATATATTATTATACAGGTTCAAATATACTATCTGTTTTCAGGGAAAACTCCCAGGTTCCGGATGTTCAA  
ATTCAATGATGGGTAACAAGTACGATCGTAAATCTGTAAAACAGTTTGTTCGGATATTAGGCTGTATCTCCTCAAAGCGT  
ATTCGAATATCATTGAGAAGCTGCAGCGTCACATCGGATAATAATGATGGCAGCCATTGTAGAAGTGCCTTTTGCATTT  
CTAGTCTCTTTCTCGGTCTAGCTAGTTTTACTACATCGCGAAGATAGAATCTTAGATCACACTGCCTTTGCTGAGCTGG  
ATCAATAGAGTAACAAAAGAGTGGTAAGGCCTCGTTAAAGGACAAGGACCTGAGCGGAAGTGTATCGTACAGTAGACGG  
AGTATACTAGTATAGTCTATAGTCCGTGGAATTCATGTTTTGACAGCTTATCATCGATAAGCTTTTCAATTC AATTCA  
TCATTTTTTTTTTTTATTCTTTTTTTTTGATTTTCGGTTTTCTTTGAAATTTTTTTGATTCGGTAATCTCCGAACAGAAGGAAG  
AACGAAGGAAGGAGCACAGACTTAGATTGGTATATATACGCATATGTAGTGTTGAAGAAACATGAAATTGCCAGTATT  
CTTAACCCAACCTGCACAGAACAAAAACCTGCAGGAAACGAAGATAAATCATGTGCGAAAGCTACATATAAGGAACGTGCT  
GCTACTCATCCTAGTCCTGTTGCTGCCAAGCTATTTAATATCATGCACGAAAAGCAAACAACTTGTGTGCTTCATTGG  
ATGTTTCGTACCACCAAGGAATTACTGGAGTTAGTTGAAGCATTAGGTCCCAAAATTTGTTTACTAAAAACACATGTGGA  
TATCTTGACTGATTTTTCCATGGAGGGCACAGTTAAGCCGCTAAAGGCATTATCCGCCAAGTACAATTTTTTACTCTTC  
GAAGACAGAAAATTTGCTGACATTGGTAATACAGTCAAATTCAGTACTCTGCGGGTGTATACAGAATAGCAGAATGGG

CAGACATTACGAATGCACACGGTGTGGTGGGCCAGGTATTGTTAGCGGTTTGAAGCAGGCGGCAGAAGAAGTAACAAA  
GGAACCTAGAGGCCCTTTTGTGTTAGCAGAATTGTCATGCAAGGGCTCCCTATCTACTGGAGAATATACTAAGGGTACT  
GTTGACATTGCGAAGAGCGACAAAAGATTTTGTATCGGCTTTATTGCTCAAAGAGACATGGGTGGAAGAGATGAAGGTT  
ACGATTGGTTGATTATGACACCCGGTGTGGGTTTATGATGACAAGGGAGACGCATTGGGTCAACAGTATAGAACCGTGGA  
TGATGTGGTCTCTACAGGATCTGACATTATTATTGTTGGAAGAGGACTATTTGCAAAGGGAAGGGATGCTAAGGTAGAG  
GGTGAACGTTACAGAAAAGCAGGCTGGGAAGCATATTTGAGAAGATGCGGCCAGCAAACTAAAAACTGTATTATAAG  
TAAATGCATGTATACTAACTCACAAATTAGAGCTTCAATTTAATTATATCAGTTATTACCCGGGAATCTCGGTCGTAA  
TGATTTTTATAATGACGAAAAAAAAAATTTGAAAGAAAAAGCTTTAATGCGGTAGTTTATCACAGTTAAATTGCTAA  
CGCAGTCAGGCACCGTGTATGAAATCTAACAATGCGCTCATCGTCATCCTCGGCACCGTCACCCTGGATGCTGTAGGCA  
TAGGCTTGGTTATGCCGGTACTGCCGGGCTCTTGCGGGATATCGTCCATTCCGACAGCATCGCCAGTCACTATGGCGT  
GCTGCTAGCGCTATATGCGTTGATGCAATTTCTATGCGCACCCGTTCTCGGAGCACTGTCCGACCGCTTTGGCCGCCG  
CCAGTCTGCTCGCTTTCGCTACTTGGAGCCACTATCGACTACGCGATCATGGCGACCACACCCGTCCTGTGGATCCTCT  
ACGCCGGACGCATCGTGGCCGGCATCACCGGCCACAGGTGCGGTTGCTGGCGCCTATATCGCCGACATCACCGATGG  
GGAAGATCGGGCTCGCCACTTCCGGCTCATGAGCGCTTGTTCGGCGTGGGTATGGTGGCAGGCCCCGTGGCCGGGGGA  
CTGTTGGGCGCCATCTCCTTGCATGCACCATTCTTGCGGCGGGGTGCTCAACGGCCTCAACCTACTACTGGGCTGCT  
TCCTAATGCAGGAGTCGCATAGCCAGTGTGATGGATATCTGCAGAATTCGCCCTTAcctacccatgtctagaaagagcc  
aatcagaatcaagtgaggctaccattacttcaaatagatthatttccgaagatccaagtaaaccggtgagagaaatttc  
cgatattgaattatcgcaatttttagaagagtcggtacatttttaaaaaaagtatttaggtggtgttcattttgtatt  
aataatattcgtaaattttgtgtatactttacttaagctttttcttttaagatttttagtaacagcttcgacaatcgcg  
tcaccaacttcagtagctgaactggtacctcttaaatctgcagttctgatacctttatccaagacttggttcacggctt  
cttctaagcttcagcttctttcacacaatccaagataatctcaacatagaagcagcagataaaaatagtagcaattgg  
gtaactttattggctggttaaatcaggagcagaaccggtgacatgggtcataaagacaaaagcgggtgtggtatctggc  
aatgaagccaaagatgcagatggttaataaaccgaaggaacctggaataactgaagcttcatcggaatgatcaccaa  
acatggttagaagtgatgattataccattcaatttgggtgggttttgaattaaaatcatggcggcggagtcacatcaattg  
atggtgaacagacaaaagttgggaactcttcagaaatcactttatcgacagttcttctccataatctagaagaagctaaa  
acattagccttatccaatgaccagattggttaatggtgggttatggtgtaaagccatgaaggcagccatacgggtgattc  
tgggtgacttcatcgacgggtgtatttttcagatcccagcgggttggttatcttcactttcttctgttcttcacgatc  
accgaaataaataaccaccaactaattcacgaacaatgatcaagtttgtacctttaacgacttctgggtctcaatggggat  
aattccaataaggagtcactggcaagttacatggtctgatgtagcataaagggttcaattctttacgaatctttaata  
aaccttgttctggacgaacggcgccagtcacccattttgggtccaccaacagcacccaataagacggcatcagatthttt  
ggcactttcaagtgcgtcatctggcaatgggacaccagtggtcatcaatggcagcaccaccgatthaaatgatggttgaaa  
tcgaaatggatthtttggtaaggagtgccagcttcaattgcttctaaaactttgatagcttcattgacaatthcggtac  
cgacgtgatcacctggtaaaattgtaatagttttagttttaaactgacattgtgggtttgggttagtgaataaaggaatta  
aggatgaaggaaaaaaattcttgagtgaaaaaattcatagcctgagtcacctcgatthttttcgtttattatattt  
ttatagtgaaacagaaaaaaattgaaccggctgcggaaccacgcagcgggttacaggagttagtcattcttcaa  
caatacgaacgtattattcatctggttcagatacatgaacgaaagtacaatttccgaaattactctatacacgataatt  
acacataacaacacaaaattcaaaaaaacaaaaaccttaatgtccactccattcgatagagttcaagtcaataccttc  
ttgaaccatttccataatggagacatcttctcaagaaatcaactcttctcattaattgcttgaataacatagtcaact

tctgcttcagtggtgaatctaccaataccgaatctaataatggaagaatgagccaagggatcatcggcacccaaagcatgta  
aaacatacagatgggtccaaagatgcagaggtacatgcagaaccagaactcaatgcaatatctttcaatgccattaacaa  
agattccccttcaatgtatgcaaaggaacattcacacaacctgggtattgatatggtgggtattacaaccgtaaac  
tgagtagatggaatggataacaaaccgcttcttcaatttagtagataaacctctcaatatggttcttgtcaaagcagatt  
cttgtttcattaatcttgcagcttcaccaaaccagctactaatgggtgggtgccaaagtacctgatctcaaaccctcttc  
ttgacccccaccagtgatgattggatccAAGGGCGAATTCCAGCACACTGGCGGTGAGAGCCTTCAACCCAGTCAGCTC  
CTTCCGGTGGGCGCGGGGCATGACTATCGTCGCCGCACTTATGACTGTCTTCTTTATCATGCAACTCGTAGGACAGGTG  
CCGGCAGCGCTCTGGGTCATTTTCCGGCGAGGACCGCTTTTCGCTGGAGCGCGACGATGATCGGCCTGTCTGCTTGGCGTAT  
TCGGAATCTTGCACGCCCTCGCTCAAGCCTTTCGTCACTGGTCCCGCCACCAAACGTTTTCCGGCGAGAAGCAGGCCATTAT  
CGCCGGCATGGCGGCCGACGCGCTGGGCTACGTCTTGTCTGGCGTTCCGCGACGCGAGGCTGGATGGCCTTCCCCATTATG  
ATTCTTCTCGCTTCCGGCGGCATCGGGATGCCCGGTTGCAGGCCATGCTGTCCAGGCAGGTAGATGACGACCATCAGG  
GACAGCTTCAAGGATCGCTCGCGGCTCTTACCAGCCTAACTTCGATCACTGGACCGCTGATCGTACGGCGATTTATGC  
CGCCTCGGCGAGCACATGGAACGGGTTGGCATGGATTGTAGGCGCCGCCCTATACCTTGTCTGCCTCCCCGCGTTGCGT  
CGCGGTGCATGGAGCCGGGCCACCTCGACCTGAATGGAAGCCGGCGGCACCTCGCTAACGGATTCAACACTCCAAGAAT  
TGGAGCCAATCAATTTTGGCGGAGAAGTGTGAATGCGCAAACCAACCTTGGCAGAACATATCCATCGCGTCCGCCATC  
TCCAGCAGCCGCACGCGGGCGCATCTCGGGCAGCGTTGGGTCTGGCCACGGGTGCGCATGATCGTGCTCCTGTCTGTTGA  
GGACCCGGCTAGGCTGGCGGGGTTGCCTTACTGGTTAGCAGAATGAATCACCGATACGCGAGCGAACGTGAAGCGACTG  
CTGCTGCAAAACGTCTGCGACCTGAGCAACAACATGAATGGTCTTCCGTTTTCCGTGTTTTCGTAAAGTCTGGAAACGCGG  
AAGTCAGCGCCCTGCACCATTATGTTCCGGATCTGCATCGCAGGATGCTGCTGGTACCCTGTGGAACACCTACATCTG  
TATTAACGAAGCTGGCATTGACCCTGAGTGATTTTTCTCTGTTCCCGCATCCATAACCGCCAGTTGTTTTACCCTC  
ACAACGTTCCAGTAACCGGGCATGTTTATCATCAGTAACCCGATCTGTCGAGCATCCTCTCTCGTTTTCATCGGTATCATT  
ACCCCCATGAACAGAAATTTCCCTTACACGGAGGCATCAAGTGACCAAACAGGAAAAAACCGCCCTTAACATGGCCCCG  
CTTTATCAGAAGCCAGACATTAACGCTTCTGGAGAAACTCAACGAGCTGGACGCGGATGAACAGGCAGACATCTGTGAA  
TCGCTTACAGACCAGCTGATGAGCTTTACCGCAGCTGCCTCGCGCGTTTTCCGGTATGACGGTGAAAACCTCTGACACA  
TGCAGCTCCCGGAGACGGTCACAGCTTGTCTGTAAGCGGATGCCGGGAGCAGACAAGCCCGTCAGGGCGCGTCAGCGGG  
TGTTGGCGGGTGTGGGGGCGCAGCCATGACCCAGTCACGTAGCGATAGCGGAGTGTATACTGGCTTAACTATGCGGCAT  
CAGAGCAGATTGTAAGTGCACCATATGCGGTGTGAAATACCGCACAGATGCGTAAGGAGAAAATACCGCATCAG  
GCGCTCTTCCGCTTCTCGCTCACTGACTCGCTGCGCTCGGTCTGTTCCGGTGCAGGCGAGCGGTATCAGCTCACTCAAAG  
GCGGTAATACGGTTATCCACAGAATCAGGGGATAACGCAGGAAAGAATGTGAGCAAAAGGCCAGCAAAAGGCCAGGA  
ACCGTAAAAAGGCCGCGTTGCTGGCGTTTTTCCATAGGCTCCGCCCCCTGACGAGCATCACAAAATCGACGCTCAAG  
TCAGAGGTGGCGAAACCCGACAGGACTATAAAGATACCAGGCGTTTTCCCTGGAAGCTCCCTCGTGCGCTCTCCTGTT  
CCGACCCTGCCGCTTACCGGATACCTGTCCGCCTTTCTCCCTTCCGGGAAGCGTGGCGCTTTTCTCATAGCTCACGCTGTA  
GGTATCTCAGTTCGGTGTAGGTCGTTCCGCTCCAAGCTGGGCTGTGTGCACGAACCCCCCGTTCAGCCCCGACCGCTGCGC  
CTTATCCGGTAACTATCGTCTTGTAGTCCAACCCGGTAAGACACGACTTATCGCCACTGGCAGCAGCCACTGGTAACAGG  
ATTAGCAGAGCGAGGTATGTAGGCGGTGCTACAGAGTCTTGAAGTGGTGGCCTAACTACGGCTACACTAGAAGGACAG  
TATTTGGTATCTGCGCTCTGCTGAAGCCAGTTACCTTCCGAAAAAGAGTTGGTAGCTCTTGATCCGGCAAACAAACCAC  
CGCTGGTAGCGGTGGTTTTTTTTGTTTGAAGCAGCAGATTACGCGCAGAAAAAAGGATCTCAAGAAGATCCTTTGATC  
TTTTCTACGGGTCTGACGCTCAGTGAACGAAAACCTCACGTTAAGGGATTTTGGTTCATGAGATTATCAAAAAGGATCT

TCACCTAGATCCTTTTTAAATTA AAAATGAAGTTTTAAATCAATCTAAAGTATATATGAGTAAACTTGGTCTGACAGTTA  
CCAATGCTTAATCAGTGAGGCACCTATCTCAGCGATCTGTCTATTTTCGTTTCATCCATAGTTGCCTGACTCCCCGTCGTG  
TAGATAACTACGATACGGGAGGGCTTACCATCTGGCCCCAGTGCTGCAATGATACCGCGAGACCCACGCTCACCGGCTC  
CAGATTTTATCAGCAATAAAACCAGCCAGCCGGAAGGGCCGAGCGCAGAAGTGGTCCTGCAACTTTATCCGCCTCCATCCA  
GTCTATTAATTGTTGCCGGAAGCTAGAGTAAGTAGTTTCGCCAGTTAATAGTTTTCGCAACGTTGTTGCCATTGCTGCA  
GGCATCGTGGTGTACGCTCGTCTGTTTGGTATGGCTTCATTCAGCTCCGGTTCCCAACGATCAAGGCGAGTTACATGAT  
CCCCATGTTGTGCAAAAAAGCGGTTAGCTCCTTCGGTCTCCGATCGTTGTGAGAAGTAAGTTGGCCGCAGTGTTATC  
ACTCATGGTTATGGCAGCACTGCATAATTCTCTTACTGTTCATGCCATCCGTAAGATGCTTTTTCTGTGACTGGTGAGTAC  
TCAACCAAGTCATTCTGAGAATAGTGTATGCGGCGACCGAGTTGCTCTTGCCCGGCGTCAACACGGGATAATACCGCGC  
CACATAGCAGAACTTTAAAAGTGCTCATCATTGAAAAAGTTCTTCGGGGCGAAAACCTCTCAAGGATCTTACCGCTGTT  
GAGATCCAGTTTCGATGTAACCCACTCGTGCACCCAACTGATCTTCAGCATCTTTTACTTTTACCAGCGTTTCTGGGTGA  
GCAAAAACAGGAAGGCAAAATGCCGCAAAAAGGGAATAAGGGCGACACGGAATGTTGAATACTCATACTCTTCCTTT  
TTCAATATTATTGAAGCATTTATCAGGGTTATTGTCTCATGAGCGGATACATATTTGAATGTATTTAGAAAAATAACA  
AATAGGGGTTCCGCGCACATTTCCCCGAAAAGTGCCACCTGACGTCTAAGAAACCATTATTATCATGACATTAACCTAT  
AAAAATAGGCGTATCACGAGGCCCTTTTCGTCTTCAA
