# Supplementary material for: Marker Recycling in Candida albicans through CRISPR-Cas9-Induced Marker Excision
Source: PubMed Central journal article supplement (PMC5352831; doi:10.1128/msphere.00050-17), 2017-03-15
Supplement: sph002172252st1.pdf [file sph002172252st1.pdf]

### Supplemental Table 1. Yeast Strains

| <i>Candida albicans</i> strains:         |                                                                                                                                    |
|------------------------------------------|------------------------------------------------------------------------------------------------------------------------------------|
| SN152                                    | <i>arg4Δ/arg4Δ leu2Δ/leu2Δ his1Δ/his1Δ URA3/ura3Δ::imm434 IRO1/iro1Δ::imm434</i>                                                   |
| MH101                                    | <i>ume6Δ::r1HIS1r1/ume6Δ::r1HIS1r1 arg4Δ/arg4Δ leu2Δ/leu2Δ his1Δ/his1Δ URA3/ura3Δ::imm434 IRO1/iro1Δ::imm434</i>                   |
| MH110                                    | <i>brg1Δ::r2LEU2r2/brg1Δ::r2LEU2r2 ume6Δ::r/ume6Δ::r arg4Δ/arg4Δ leu2Δ/leu2Δ his1Δ/his1Δ URA3/ura3Δ::imm434 IRO1/iro1Δ::imm434</i> |
| <i>Saccharomyces cerevisiae</i> strains: |                                                                                                                                    |
| BJ8918                                   | <i>MATa trp1Δ his3-Δ200 ura3-52 leu2Δ</i>                                                                                          |
