# Supplementary material for: Marker Recycling in Candida albicans through CRISPR-Cas9-Induced Marker Excision
Source: PubMed Central journal article supplement (PMC5352831; doi:10.1128/msphere.00050-17), 2017-03-15
Supplement: sph002172252st2.pdf [file sph002172252st2.pdf]

## Supplemental Table 2. Primers

| sgRNA Primers:           |                                                                                                         |
|--------------------------|---------------------------------------------------------------------------------------------------------|
| BCR1-sgRNA/F             | atcaggtgtactttcaaagGTTTTAGAGCTAGAAATAGCAAGTTAAA                                                         |
| BCR1-SNR52/R             | ctttgaaaagtacacctgatCAAATTAATAATAGTTTACGCAAGTC                                                          |
| BRG1-sgRNA/F             | GTA CTACAGAGACACCTGAAGTTTTAGAGCTAGAAATAGCAAGTTAAA                                                       |
| BRG1-SNR52/R             | TTCAGGTGTCTCTGTAGTACCAAATTAATAATAGTTTACGCAAGTC                                                          |
| Cd.HIS1-sgRNA/F          | taaccattactccaggtagaGTTTTAGAGCTAGAAATAGCAAGTTAAA                                                        |
| Cd.HIS1-SNR52/R          | tctacgtggagtaatggtaCAAATTAATAATAGTTTACGCAAGTC                                                           |
| Cm.LEU2-sgRNA/F          | atcagaactgcagattaaagGTTTTAGAGCTAGAAATAGCAAGTTAAA                                                        |
| Cm.LEU2-SNR52/R          | cttaaactgcagttctgatCAAATTAATAATAGTTTACGCAAGTC                                                           |
| UME6-sgRNA/F             | GGAGTTGGACTTGGAAGTAGTTTTAGAGCTAGAAATAGCAAGTTAAA                                                         |
| UME6-SNR52/R             | CTACTTCCAAGTCCAACCTCCCAAATTAATAATAGTTTACGCAAGTC                                                         |
| Partner Cloning Primers: |                                                                                                         |
| BCR1_FlankHis_KpnI/F     | atattattaataaacttaaatTTTcaaaaacaactacaacaacta<br>taattaataactatctcgatatatcCTCGAGGTGCGACGGTATCG          |
| BCR1_FlankHis_SapI/R     | aaacatcacaagacataagcaataaataaataaataaataaaatacatt<br>ttcacatacttcttctattattattgCCAATACGCAAACCGCC        |
| BRG1_FlankLeu_BamHI/F    | ATATTTGATATTTCAACGTTATTTCTCCATCCATACTTGTTACATTATAA<br>ATATTCATACTATTCCAGAAATTCAAATTGACGCATCGTGGCCG      |
| BRG1_FlankLeu_Sall/R     | TGTGCAAAAAATTAATTAATAACTATTTTAATGACGAATTAAGGAATTTG<br>GGTTGGGTAAGCAACAGGAATACCGCCAGCGACTCCTGCATTAGGAAGC |
| HIS1 CRIME/F             | gcgcaagaagcctcaact                                                                                      |
| His1 CRIME/R             | gagctacagggcttgacc                                                                                      |
| LEU2 CRIME/F             | tcactttatcgacagttcttctcc                                                                                |
| LEU2 CRIME/R             | actaactcctgtaacggcg                                                                                     |
| UME6_FlankHis_KpnI/F     | TCATATTCTATATCTTCACTCCAAACATCAATATCCTCAATTTACTTCCAA<br>TTAGTTTTATTTTTAATCCACTGTATAACTCGAGGTGCGACGGTATCG |

|                                                   |                                                                                               |
|---------------------------------------------------|-----------------------------------------------------------------------------------------------|
| UME6_FlankHis_SapI/R                              | ACCAACGGCAACAACAACAACAATAACCACCGTCAACCGTCAACCTGT<br>TAATTCTTAATTCTTAAGCTAATTCCAATACGCAAACCGCC |
| Primers for Gap Repair of <i>HIS1</i> into pRS424 |                                                                                               |
| KpnI_pRS424_H+AdapN/F                             | AGCGCGCGTAATACGACTCACTATAGGGCGGCCAGTGTGATGGATATCTGCAG                                         |
| KpnI_pRS424_H+AdapN/R                             | ATCAAGCTTATCGATACCGTCGACCTCGAGCCGCCAGTGTGCTGGAAT                                              |
| SapI_pRS424_H+AdapN/F                             | ACGCGCGGGGAGAGGGCGTTTTCGTATTGGGCCAGTGTGATGGATATCTGCAG                                         |
| SapI_pRS424_H+AdapN/R                             | GCAGCCGAACGACCGAGCGCAGCGAGTCAGCCGCCAGTGTGCTGGAAT                                              |
| Primers for Gap Repair of <i>LEU2</i> into YEp24  |                                                                                               |
| BamHI_YEp24_H+AdapN/F                             | CTATCGACTACGCGATCATGGCGACCACACGCCAGTGTGATGGATATCTGCAG                                         |
| BamHI_YEp24_H+AdapN/R                             | TGGCGCCGGTGTATGCCGGCCACGATGCGTCCC GCCAGTGTGCTGGAAT                                            |
| Sall_YEp24_H+AdapN/F                              | TGGGCTGCTTCTAATGCAGGAGTCGCATAGCCAGTGTGATGGATATCTGCAG                                          |
| Sall_YEp24_H+AdapN/R                              | GGAAGGAGCTGACTGGGTTGAAGGCTCTCACCGCCAGTGTGCTGGAAT                                              |
| Genotyping Primers                                |                                                                                               |
| BCR1 Check Int/R                                  | ACAACCAGGATATCCAGTACA                                                                         |
| BCR1 Check/F                                      | GTCTCCTTCAATCAAACGATCA                                                                        |
| BRG1 Check Down/R                                 | CGGTTTGATCCAGCTCAGG                                                                           |
| BRG1 Check Int/R                                  | GGTATTGATTACTCTTGTCACTGG                                                                      |
| BRG1 Check/F                                      | ACGTTATTTCTCCATCCATACTTG                                                                      |
| HIS1 Check Int/R                                  | ggctgattgtctttacatcg                                                                          |
| LEU2 Check Int/R                                  | cctcacttgattctgattggc                                                                         |
| pRS424 Check/F                                    | GCCATTGCGCCATTCAGG                                                                            |
| UME6 Check Down/R                                 | GAATCTTCTACGGGAAAAGTTGCAAGA                                                                   |
| UME6 Check Int/R                                  | CTATTGGTGTTTGGAAATATGGATTTGC                                                                  |
| UME6 Check/F                                      | CATTATTGCTTTGCTTTACATAATTGGTGATAG                                                             |
| Yep24 Check/F                                     | ACAAGGGAGACGCATTGG                                                                            |
